# Supplementary material
Source: PubMed Central journal article supplement (PMC8919954)
Supplement: ehp9875.s001.acco.pdf [file ehp9875.s001.acco.pdf]

**Note to readers with disabilities:** *EHP* strives to ensure that all journal content is accessible to all readers. However, some figures and Supplemental Material published in *EHP* articles may not conform to [508 standards](#) due to the complexity of the information being presented. If you need assistance accessing journal content, please contact [ehp508@niehs.nih.gov](mailto:ehp508@niehs.nih.gov). Our staff will work with you to assess and meet your accessibility needs within 3 working days.

### **Supplemental Material**

#### **Prenatal Exposure to Per- and Polyfluoroalkyl Substances and Child Growth Trajectories in the First Two Years**

Yu Gao, Jiajun Luo, Yan Zhang, Chengyu Pan, Yunjie Ren, Jun Zhang, and Ying Tian for the Shanghai Birth Cohort

#### **Table of Contents**

**Table S1.** Distribution of selected characteristics in the source population and the study population in Shanghai Birth Cohort, Shanghai, China, recruited from 2013 to 2016.

**Table S2.** Anthropometric measures in children at 3days, 42 days, 6 months, 12 months and 24 months in Shanghai Birth Cohort, Shanghai, China, recruited from 2013 to 2016.

**Table S3.** Definitions for five trajectory groups for each anthropometrical measure in Shanghai Birth Cohort, Shanghai, China, recruited from 2013 to 2016.

**Table S4.** Bayesian information criterion (BIC) and  $2\Delta\text{BIC}$  for model selection in group-based trajectory modeling (GBTM) in Shanghai Birth Cohort, Shanghai, China, recruited from 2013 to 2016.

**Table S5.** First-trimester maternal plasma concentrations of PFASs (ng/ml) in Shanghai Birth Cohort, Shanghai, China (n = 1,350), recruited from 2013 to 2016.

**Table S6.** Odds ratio (OR) and 95% confidence interval (CI) for trajectory groups in each anthropometrical measure according to per doubling increase in prenatal PFAS level (ng/ml) in Shanghai Birth Cohort, Shanghai, China, recruited from 2013 to 2016.

**Table S7.** Weights for each PFAS in weighted quantile sum (WQS) regression in Shanghai Birth Cohort, Shanghai, China, recruited from 2013 to 2016.

**Table S8.** Odds ratio (OR) and 95% confidence interval (CI) for trajectory groups of weight-for-age and length-for-age according to per doubling increase in prenatal PFAS level (ng/ml) (stratified by sex) in Shanghai Birth Cohort, Shanghai, China, recruited from 2013 to 2016.

**Table S9.** Odds ratio (OR) and 95% confidence interval (CI) for trajectory groups of weight-for-length and head-circumference-for-age according to per doubling increase in prenatal PFAS level (ng/ml) (stratified by sex) in Shanghai Birth Cohort, Shanghai, China, recruited from 2013 to 2016.

**Table S10.** The number of participants in each trajectory and the number by sex in Shanghai Birth Cohort, Shanghai, China, recruited from 2013 to 2016.

**Table S11.** Odds ratio (OR) and 95% confidence interval (CI) for trajectory groups in each anthropometrical measure according to per doubling increase in prenatal PFAS level (ng/ml) for sensitivity analysis in Shanghai Birth Cohort, Shanghai, China, recruited from 2013 to 2016 (additionally adjusted for active or passive smoking during pregnancy, gestational weight gain, breastfeeding after birth, delivery method, child sex, nutrient supplementation during pregnancy, infant nutrient supplementation, and infancy outdoor activity).

**Table S12.** *P* values for departure from linearity in generalized additive models (GAM) in Shanghai Birth Cohort, Shanghai, China, recruited from 2013 to 2016.

**Figure S1.** Flowchart for study population selection in Shanghai Birth Cohort, Shanghai, China, recruited from 2013 to 2016.

**Figure S2.** The directed acyclic graph (DAG) for all potential confounders considered in the statistical analyses in Shanghai Birth Cohort, Shanghai, China, recruited from 2013 to 2016. The directed paths from prenatal PFAS to offspring growth represents the potential causal effect of interests that we aim to investigate in this study. Variables with parenthesis indicate possible unmeasured/uncontrolled confounders that should be evaluated for their potential impacts in future studies.

**Figure S3.** Relationship between prenatal PFAS level (ng/ml) and trajectory groups in each anthropometrical measure in the generalized additive models (GAM), both the fitted and 95% confidence interval lines are presented in Shanghai Birth Cohort, Shanghai, China, recruited from 2013 to 2016.

Table S1. Distribution of selected characteristics in the source population and the study population in Shanghai Birth Cohort, Shanghai, China, recruited from 2013 to 2016.

| Selected characteristics                                 | Source population<br>(N=3078) | Study population<br>(n=1350) |
|----------------------------------------------------------|-------------------------------|------------------------------|
| Maternal age (year)                                      |                               |                              |
| <25                                                      | 203 (7.1)                     | 99 (7.3)                     |
| 25-29                                                    | 1461 (51.0)                   | 717 (53.2)                   |
| 30-34                                                    | 920 (32.1)                    | 406 (30.1)                   |
| ≥35                                                      | 279 (9.7)                     | 126 (9.3)                    |
| Missing                                                  | 215                           | 2                            |
| Maternal education                                       |                               |                              |
| High school or less                                      | 302 (9.9)                     | 147 (10.9)                   |
| Associate or bachelor                                    | 2380 (77.7)                   | 1074 (79.7)                  |
| Graduate                                                 | 380 (12.4)                    | 126 (9.4)                    |
| Missing                                                  | 16                            | 3                            |
| Parity                                                   |                               |                              |
| Nulliparous                                              | 2566 (83.4)                   | 1151 (85.3)                  |
| Multiparous                                              | 512 (16.6)                    | 199 (14.7)                   |
| Active or passive smoking during pregnancy               |                               |                              |
| No                                                       | 1879 (64.8)                   | 845 (63.1)                   |
| Yes                                                      | 1020 (35.2)                   | 494 (36.9)                   |
| Missing                                                  | 179                           | 11                           |
| Pre-pregnancy BMI                                        |                               |                              |
| <18.5                                                    | 445 (14.8)                    | 208 (15.6)                   |
| 18.5-24.9                                                | 2244 (74.5)                   | 981 (73.4)                   |
| ≥25                                                      | 322 (10.7)                    | 148 (11.1)                   |
| Missing                                                  | 67                            | 13                           |
| Fish or seafood intake during pregnancy                  |                               |                              |
| No                                                       | 118 (4.2)                     | 53 (4.0)                     |
| <1 /week                                                 | 333 (11.9)                    | 148 (11.3)                   |
| 1-3 /week                                                | 1946 (69.5)                   | 917 (69.7)                   |
| 4-7 /week                                                | 381 (13.6)                    | 186 (14.1)                   |
| >7 /week                                                 | 23 (0.8)                      | 11 (0.8)                     |
| Missing                                                  | 277                           | 35                           |
| Gestational weight gain (kg)                             |                               |                              |
| <12                                                      | 682 (25.1)                    | 327 (25.4)                   |
| 12-14.9                                                  | 675 (24.9)                    | 319 (24.8)                   |
| 15-17.9                                                  | 651 (24.0)                    | 323 (25.1)                   |
| ≥18                                                      | 707 (26.0)                    | 319 (24.8)                   |
| Missing                                                  | 363                           | 62                           |
| Breastfeeding after birth                                |                               |                              |
| No                                                       | 75 (2.9)                      | 40 (3.0)                     |
| Yes, less than 6 months                                  | 773 (29.4)                    | 350 (25.9)                   |
| Yes, more than 6 months                                  | 1782 (67.8)                   | 960 (71.1)                   |
| Missing                                                  | 448                           | 0                            |
| Delivery method                                          |                               |                              |
| Vaginal delivery                                         | 1924 (62.5)                   | 770 (57.0)                   |
| Cesarean delivery                                        | 1154 (37.5)                   | 580 (43.0)                   |
| Child sex                                                |                               |                              |
| Female                                                   | 1327 (48.7)                   | 644 (47.7)                   |
| Male                                                     | 1396 (51.3)                   | 706 (52.3)                   |
| Missing                                                  | 355                           | 0                            |
| Pregnancy eGFR (mL/min/1.73m <sup>2</sup> ) <sup>a</sup> | 157.7 (139.2-182.5)           | 157.8(139.0-183.1)           |

Note: SBC: Shanghai Birth Cohort; eGFR: estimated glomerular filtration rate. <sup>a</sup> Median (inter-quartile range).

Table S2. Anthropometric measures in children at 3days, 42 days, 6 months, 12 months and 24 months in Shanghai Birth Cohort, Shanghai, China, recruited from 2013 to 2016.

|                           | <b>Mean (SD)</b> |              |              |              |              |
|---------------------------|------------------|--------------|--------------|--------------|--------------|
|                           | At birth         | 42 days      | 6 months     | 12 months    | 24 months    |
| <b>Weight</b>             |                  |              |              |              |              |
| N                         | 2266             | 2128         | 1841         | 1928         | 1947         |
| Original value (kg)       | 3.38 (0.44)      | 5.14 (0.62)  | 8.61 (1.02)  | 10.26 (1.14) | 12.87 (1.44) |
| z score*                  | 0.13 (0.92)      | 0.55 (0.92)  | 0.82 (0.97)  | 0.74 (0.91)  | 0.66 (0.89)  |
| <b>Length/height</b>      |                  |              |              |              |              |
| N                         | 1882             | 2065         | 1836         | 1927         | 1945         |
| Original value (cm)       | 49.92 (1.19)     | 56.74 (2.28) | 68.65 (2.64) | 76.18 (2.60) | 88.66 (3.25) |
| z score*                  | -0.07 (0.65)     | 0.54 (1.13)  | 0.55 (1.08)  | 0.42 (1.01)  | 0.57 (1.00)  |
| <b>Weight-for-length</b>  |                  |              |              |              |              |
| N                         | 1873             | 2061         | 1836         | 1922         | 1943         |
| z score*                  | 0.12 (1.15)      | 0.20 (1.20)  | 0.78 (1.01)  | 0.75 (0.96)  | 0.46 (0.96)  |
| <b>Head circumference</b> |                  |              |              |              |              |
| N                         | 1900             | 2047         | 1816         | 1892         | 1790         |
| Original value (cm)       | 34.36 (1.18)     | 37.91 (1.17) | 43.50 (1.35) | 45.90 (1.35) | 48.36 (1.33) |
| z score*                  | -0.10 (0.97)     | 0.20 (0.95)  | 0.34 (0.96)  | 0.26 (0.95)  | 0.46 (0.92)  |

\* The z score was calculated based on child growth standards from World Health Organization.

Table S3. Definitions for five trajectory groups for each anthropometrical measure in Shanghai Birth Cohort, Shanghai, China, recruited from 2013 to 2016.

|                                             | Trajectory groups                                                                     |                                                                                           |                                                                                               |                                                                                              |                                                                                        |
|---------------------------------------------|---------------------------------------------------------------------------------------|-------------------------------------------------------------------------------------------|-----------------------------------------------------------------------------------------------|----------------------------------------------------------------------------------------------|----------------------------------------------------------------------------------------|
| Weight-for-age z score (WAZ)                | <b>High-rising</b><br>Initial value: z = 0.85<br>At the end of follow-up:<br>z = 2.01 | <b>High-stable</b><br>Initial value: z = 0.63<br>At the end of follow-up:<br>z = 1.01     | <b>Moderate-stable</b><br>Initial value: z = 0.12<br>At the end of the follow-up:<br>z = 0.13 | <b>Low-rising</b><br>Initial value: z = -0.70<br>At the end of follow-up: z<br>= 0.91        | <b>Low-stable</b><br>Initial value: z = -1.04<br>At the end of follow-up:<br>z = -0.57 |
| Length-for-age z score (LAZ)                | <b>High-rising</b><br>Initial value: z = 0.43<br>At the end of follow-up:<br>z = 2.73 | <b>Moderate-rising</b><br>Initial value: z = 0.16<br>At the end of follow-up:<br>z = 1.38 | <b>Moderate-stable</b><br>Initial value: z = -0.09<br>At the end of follow-up: z =<br>0.49    | <b>Moderate-falling</b><br>Initial value: z = -0.23<br>At the end of follow-up: z<br>= -0.35 | <b>Low-rising</b><br>Initial value: z = -1.64<br>At the end of follow-up:<br>z = -0.75 |
| Weight-for-length z score (WLZ)             | <b>High-rising</b><br>Initial value: z = 0.68<br>At the end of follow-up:<br>z = 1.48 | <b>High-stable</b><br>Initial value: z = 0.60<br>At the end of follow-up:<br>z = 0.63     | <b>Moderate-stable</b><br>Initial value: z = -0.14<br>At the end of follow-up: z =<br>-0.01   | <b>Low-rising</b><br>Initial value: z = -0.67<br>At the end of follow-up: z<br>= 1.10        | <b>Low-stable</b><br>Initial value: z = -1.18<br>At the end of follow-up:<br>z = -0.58 |
| Head-circumference-for-age z<br>score (HCZ) | <b>High-stable</b><br>Initial value: z = 1.10<br>At the end of follow-up:<br>z = 1.69 | <b>Moderate-rising</b><br>Initial value: z = 0.09<br>At the end of follow-up:<br>z = 1.07 | <b>Moderate-stable</b><br>Initial value: z = -0.27<br>At the end of follow-up: z =<br>-0.30   | <b>Low-stable</b><br>Initial value: z = -0.74<br>At the end of follow-up: z<br>= -0.56       | <b>Low-rising</b><br>Initial value: z = -2.20<br>At the end of follow-up:<br>z = 0.38  |

Table S4. Bayesian information criterion (BIC) and  $2\Delta\text{BIC}^a$  for model selection in group-based trajectory modeling (GBTM) in Shanghai Birth Cohort, Shanghai, China, recruited from 2013 to 2016.

| Number of groups                                | BIC      | Null model | $2\Delta\text{BIC}^a$ | Posterior probability for final model |
|-------------------------------------------------|----------|------------|-----------------------|---------------------------------------|
| <b>Weight-for-age z-score (WAZ)</b>             |          |            |                       | 0.84                                  |
| 1                                               | -9286.13 |            |                       |                                       |
| 2                                               | -8691.49 | 1          | 1189.28               |                                       |
| 3                                               | -8548.15 | 2          | 286.68                |                                       |
| 4                                               | -8496.27 | 3          | 103.76                |                                       |
| 5                                               | -8490.63 | 4          | 11.28                 |                                       |
| 6                                               | -8497.84 | 5          | -14.42                |                                       |
| <b>Length-for-age z-score (LAZ)</b>             |          |            |                       | 0.86                                  |
| 1                                               | -8824.66 |            |                       |                                       |
| 2                                               | -8372.31 | 1          | 904.7                 |                                       |
| 3                                               | -8288.95 | 2          | 166.72                |                                       |
| 4                                               | -8264.22 | 3          | 49.46                 |                                       |
| 5                                               | -8259.65 | 4          | 9.14                  |                                       |
| 6                                               | -8266.77 | 5          | -14.24                |                                       |
| <b>Weight-for-length z-score (WLZ)</b>          |          |            |                       | 0.72                                  |
| 1                                               | -8215.30 |            |                       |                                       |
| 2                                               | -7867.76 | 1          | 695.08                |                                       |
| 3                                               | -7823.54 | 2          | 88.44                 |                                       |
| 4                                               | -7777.81 | 3          | 91.46                 |                                       |
| 5                                               | -7755.14 | 4          | 45.34                 |                                       |
| 6                                               | -7755.74 | 5          | -1.2                  |                                       |
| <b>Head-circumference-for-age z-score (HCZ)</b> |          |            |                       | 0.85                                  |
| 1                                               | -7550.48 |            |                       |                                       |
| 2                                               | -7124.89 | 1          | 851.18                |                                       |
| 3                                               | -7021.93 | 2          | 205.92                |                                       |
| 4                                               | -7007.96 | 3          | 27.94                 |                                       |
| 5                                               | -7001.03 | 4          | 13.86                 |                                       |
| 6                                               | -7008.02 | 5          | -13.98                |                                       |

<sup>a</sup> The twice difference in BICs between the current model and the null model. A value lower than 2 means no enough evidence against the null model.

Table S5 First-trimester maternal plasma concentrations of PFASs (ng/ml) in Shanghai Birth Cohort, Shanghai, China (n = 1,350), recruited from 2013 to 2016.

| PFASs | LOD<br>(ng/ml) | % >LOD | Concentrations (ng/ml) |       |      |      |       |       |       |
|-------|----------------|--------|------------------------|-------|------|------|-------|-------|-------|
|       |                |        | Min                    | Max   | 5th  | 25th | 50th  | 75th  | 95th  |
| PFOS  | 0.090          | 100.00 | 1.85                   | 52.54 | 4.14 | 6.75 | 9.68  | 13.60 | 23.36 |
| PFOA  | 0.090          | 100.00 | 2.43                   | 89.10 | 6.36 | 9.24 | 11.66 | 14.80 | 20.87 |
| PFNA  | 0.020          | 100.00 | 0.07                   | 10.22 | 0.77 | 1.27 | 1.77  | 2.41  | 3.90  |
| PFDA  | 0.020          | 100.00 | 0.21                   | 20.66 | 0.68 | 1.23 | 1.82  | 2.67  | 4.74  |
| PFUA  | 0.020          | 99.99  | 0.14                   | 8.11  | 0.56 | 1.02 | 1.48  | 2.10  | 3.69  |
| PFHxS | 0.020          | 99.99  | 0.21                   | 3.75  | 0.31 | 0.43 | 0.54  | 0.68  | 0.99  |
| PFHpA | 0.030          | 81.04  | 0.00                   | 2.49  | 0.00 | 0.04 | 0.06  | 0.08  | 0.18  |
| PFDoA | 0.050          | 62.59  | 0.00                   | 9.89  | 0.00 | 0.00 | 0.15  | 0.24  | 7.28  |
| PFBS  | 0.009          | 62.37  | 0.00                   | 7.00  | 0.00 | 0.00 | 0.02  | 0.05  | 0.11  |
| PFOSA | 0.120          | 23.48  | 0.00                   | 0.61  | 0.00 | 0.00 | 0.00  | 0.00  | 0.23  |

Table S6. Odds ratio (OR) and 95% confidence interval (CI) for trajectory groups in each anthropometrical measure according to per doubling increase in prenatal PFAS level (ng/ml) in Shanghai Birth Cohort, Shanghai, China, recruited from 2013 to 2016.

| PFAS      | OR (95% CI)                                                 |                                                                  |                                                             |                                                                 |
|-----------|-------------------------------------------------------------|------------------------------------------------------------------|-------------------------------------------------------------|-----------------------------------------------------------------|
|           | Weight-for-age z-score (WAZ)                                | Length-for-age z-score (LAZ)                                     | Weight-for-length z-score (WLZ)                             | Head-circumference-for-age z-score (HCZ)                        |
|           | <b>High-rising vs. moderate-stable</b><br>(n=127 vs. n=429) | <b>High-rising vs. moderate-stable</b><br>(n=36 vs. n=552)       | <b>High-rising vs. moderate-stable</b><br>(n=149 vs. n=493) | <b>High-stable vs. moderate-stable</b><br>(n=47 vs. n=472)      |
| PFOS      | 0.90 (0.68, 1.19)                                           | 1.21 (0.77, 1.92)                                                | 0.82 (0.63, 1.06)                                           | 0.87 (0.57, 1.34)                                               |
| PFOA      | 0.93 (0.64, 1.35)                                           | 1.35 (0.75, 2.43)                                                | 0.98 (0.70, 1.38)                                           | 0.92 (0.53, 1.59)                                               |
| PFNA      | 0.94 (0.70, 1.26)                                           | 1.58 (0.96, 2.58)                                                | 0.82 (0.63, 1.07)                                           | 0.75 (0.48, 1.17)                                               |
| PFDA      | 0.97 (0.75, 1.24)                                           | 1.35 (0.89, 2.05)                                                | 0.89 (0.71, 1.12)                                           | 0.75 (0.51, 1.08)                                               |
| PFHxS     | 0.89 (0.60, 1.31)                                           | 1.08 (0.57, 2.04)                                                | 0.88 (0.62, 1.25)                                           | 0.58 (0.32, 1.05)                                               |
| PFUA      | 1.00 (0.78, 1.29)                                           | 1.41 (0.91, 2.17)                                                | 0.86 (0.68, 1.08)                                           | 0.71 (0.49, 1.04)                                               |
| PFHpA     | 0.91 (0.78, 1.08)                                           | 1.23 (0.93, 1.62)                                                | 0.85 (0.73, 0.98)                                           | 0.75 (0.59, 0.96)                                               |
| WQS index | 0.86 (0.66, 1.12)                                           | 1.38 (0.93, 2.05)                                                | 0.84 (0.68, 1.05)                                           | 0.62 (0.43, 0.89)                                               |
|           | <b>High-stable vs. moderate-stable</b><br>(n=488 vs. n=429) | <b>Moderate-rising vs. moderate-stable</b><br>(n=312 vs. n=552)  | <b>High-stable vs. moderate-stable</b><br>(n=367 vs. n=493) | <b>Moderate-rising vs. moderate-stable</b><br>(n=373 vs. n=472) |
| PFOS      | 1.01 (0.85, 1.20)                                           | 1.02 (0.84, 1.23)                                                | 1.11 (0.92, 1.34)                                           | 1.00 (0.82, 1.21)                                               |
| PFOA      | 1.06 (0.84, 1.35)                                           | 0.90 (0.70, 1.16)                                                | 1.09 (0.85, 1.40)                                           | 0.97 (0.75, 1.25)                                               |
| PFNA      | 1.09 (0.91, 1.32)                                           | 0.99 (0.81, 1.21)                                                | 1.13 (0.93, 1.38)                                           | 1.05 (0.86, 1.28)                                               |
| PFDA      | 1.05 (0.90, 1.23)                                           | 1.04 (0.88, 1.23)                                                | 1.13 (0.95, 1.33)                                           | 1.07 (0.90, 1.27)                                               |
| PFHxS     | 1.01 (0.79, 1.29)                                           | 1.04 (0.80, 1.35)                                                | 1.15 (0.89, 1.48)                                           | 0.79 (0.61, 1.03)                                               |
| PFUA      | 1.09 (0.93, 1.28)                                           | 1.05 (0.89, 1.25)                                                | 1.11 (0.94, 1.32)                                           | 1.09 (0.92, 1.30)                                               |
| PFHpA     | 1.02 (0.93, 1.13)                                           | 0.97 (0.87, 1.08)                                                | 1.01 (0.91, 1.12)                                           | 1.07 (0.96, 1.19)                                               |
| WQS index | 1.08 (0.93, 1.27)                                           | 0.95 (0.79, 1.14)                                                | 1.12 (0.94, 1.34)                                           | 1.01 (0.85, 1.20)                                               |
|           | <b>Low-rising vs. moderate-stable</b><br>(n=157 vs. n=429)  | <b>Moderate-falling vs. moderate-stable</b><br>(n=221 vs. n=552) | <b>Low-rising vs. moderate-stable</b><br>(n=74 vs. n=493)   | <b>Low-stable vs. moderate-stable</b><br>(n=159 vs. n=472)      |
| PFOS      | 1.04 (0.81, 1.34)                                           | 0.94 (0.76, 1.16)                                                | 0.70 (0.51, 0.97)                                           | 0.80 (0.62, 1.02)                                               |
| PFOA      | 1.23 (0.88, 1.72)                                           | 0.92 (0.69, 1.22)                                                | 1.01 (0.66, 1.53)                                           | 0.75 (0.54, 1.05)                                               |
| PFNA      | 1.13 (0.87, 1.47)                                           | 0.93 (0.74, 1.15)                                                | 0.81 (0.59, 1.12)                                           | 0.74 (0.57, 0.95)                                               |
| PFDA      | 1.12 (0.90, 1.40)                                           | 0.93 (0.77, 1.12)                                                | 0.84 (0.64, 1.11)                                           | 0.76 (0.61, 0.95)                                               |
| PFHxS     | 1.57 (1.13, 2.18)                                           | 1.06 (0.79, 1.42)                                                | 0.83 (0.55, 1.27)                                           | 0.72 (0.51, 1.02)                                               |
| PFUA      | 1.13 (0.90, 1.41)                                           | 0.95 (0.79, 1.15)                                                | 0.84 (0.64, 1.11)                                           | 0.75 (0.60, 0.93)                                               |
| PFHpA     | 1.01 (0.81, 1.27)                                           | 0.98 (0.87, 1.11)                                                | 0.83 (0.70, 0.98)                                           | 1.05 (0.91, 1.21)                                               |
| WQS index | 1.34 (1.09, 1.65)                                           | 0.90 (0.73, 1.10)                                                | 0.63 (0.46, 0.74)                                           | 0.68 (0.55, 0.85)                                               |
|           | <b>Low-stable vs. moderate-stable</b><br>(n=145 vs. n=429)  | <b>Low-rising vs. moderate-stable</b><br>(n=19 vs. n=552)        | <b>Low-stable vs. moderate-stable</b><br>(n=51 vs. n=493)   | <b>Low-rising vs. moderate-stable</b><br>(n=42 vs. n=472)       |
| PFOS      | 1.07 (0.83, 1.37)                                           | 0.82 (0.43, 1.55)                                                | 1.09 (0.74, 1.60)                                           | 0.67 (0.40, 1.14)                                               |
| PFOA      | 1.10 (0.77, 1.56)                                           | 1.23 (0.52, 2.91)                                                | 1.26 (0.75, 2.10)                                           | 0.97 (0.49, 1.90)                                               |
| PFNA      | 1.18 (0.90, 1.54)                                           | 1.17 (0.61, 2.23)                                                | 1.08 (0.72, 1.62)                                           | 0.64 (0.39, 1.07)                                               |
| PFDA      | 1.01 (0.81, 1.27)                                           | 0.82 (0.47, 1.43)                                                | 1.09 (0.78, 1.54)                                           | 0.63 (0.40, 0.99)                                               |
| PFHxS     | 1.05 (0.73, 1.50)                                           | 0.73 (0.30, 1.78)                                                | 1.21 (0.72, 2.02)                                           | 0.59 (0.29, 1.20)                                               |
| PFUA      | 1.07 (0.85, 1.35)                                           | 0.82 (0.48, 1.40)                                                | 1.10 (0.77, 1.56)                                           | 0.62 (0.40, 0.96)                                               |
| PFHpA     | 1.02 (0.88, 1.19)                                           | 1.11 (0.76, 1.62)                                                | 1.02 (0.81, 1.27)                                           | 0.99 (0.75, 1.30)                                               |
| WQS index | 1.10 (0.87, 1.38)                                           | 0.73 (0.43, 1.26)                                                | 1.20 (0.83, 1.75)                                           | 0.50 (0.31, 0.80)                                               |

A WQS index was created using all six types of PFAS to reflect the mixture exposure level.

All models were adjusted for maternal age, maternal education, pre-pregnancy BMI, fish and seafood intake, parity, and pregnancy estimated glomerular filtration rate (eGFR).



Table S7. Weights for each PFAS in weighted quantile sum (WQS) regression in Shanghai Birth Cohort, Shanghai, China, recruited from 2013 to 2016.

| PFAS  | Weights for each PFAS in WQS regression                     |                                                                  |                                                             |                                                                 |
|-------|-------------------------------------------------------------|------------------------------------------------------------------|-------------------------------------------------------------|-----------------------------------------------------------------|
|       | Weight-for-age z-score (WAZ)                                | Length-for-age z-score (LAZ)                                     | Weight-for-length z-score (WLZ)                             | Head-circumference-for-age z-score (HCZ)                        |
|       | <b>High-rising vs. moderate-stable</b><br>(n=127 vs. n=429) | <b>High-rising vs. moderate-stable</b><br>(n=36 vs. n=552)       | <b>High-rising vs. moderate-stable</b><br>(n=149 vs. n=493) | <b>High-stable vs. moderate-stable</b><br>(n=47 vs. n=472)      |
| PFOS  | 0.22                                                        | 0.04                                                             | 0.27                                                        | <0.01                                                           |
| PFOA  | 0.26                                                        | 0.10                                                             | <0.01                                                       | 0.01                                                            |
| PFNA  | 0.04                                                        | 0.06                                                             | 0.14                                                        | 0.12                                                            |
| PFDA  | 0.05                                                        | 0.53                                                             | 0.10                                                        | 0.18                                                            |
| PFHxS | 0.37                                                        | <0.01                                                            | 0.33                                                        | 0.34                                                            |
| PFUA  | <0.01                                                       | 0.14                                                             | 0.04                                                        | 0.33                                                            |
| PFHpA | 0.06                                                        | 0.13                                                             | 0.12                                                        | <0.01                                                           |
|       | <b>High-stable vs. moderate-stable</b><br>(n=488 vs. n=429) | <b>Moderate-rising vs. moderate-stable</b><br>(n=312 vs. n=552)  | <b>High-stable vs. moderate-stable</b><br>(n=367 vs. n=493) | <b>Moderate-rising vs. moderate-stable</b><br>(n=373 vs. n=472) |
| PFOS  | <0.01                                                       | 0.06                                                             | 0.01                                                        | 0.07                                                            |
| PFOA  | 0.04                                                        | 0.18                                                             | 0.26                                                        | 0.08                                                            |
| PFNA  | 0.09                                                        | 0.10                                                             | 0.07                                                        | 0.02                                                            |
| PFDA  | 0.13                                                        | 0.05                                                             | 0.38                                                        | 0.10                                                            |
| PFHxS | 0.08                                                        | 0.08                                                             | 0.05                                                        | <0.01                                                           |
| PFUA  | 0.47                                                        | 0.09                                                             | 0.04                                                        | 0.47                                                            |
| PFHpA | 0.18                                                        | 0.44                                                             | 0.19                                                        | 0.26                                                            |
|       | <b>Low-rising vs. moderate-stable</b><br>(n=157 vs. n=429)  | <b>Moderate-falling vs. moderate-stable</b><br>(n=221 vs. n=552) | <b>Low-rising vs. moderate-stable</b><br>(n=74 vs. n=493)   | <b>Low-stable vs. moderate-stable</b><br>(n=159 vs. n=472)      |
| PFOS  | <0.01                                                       | 0.17                                                             | 0.19                                                        | 0.01                                                            |
| PFOA  | 0.02                                                        | 0.20                                                             | <0.01                                                       | 0.02                                                            |
| PFNA  | 0.02                                                        | 0.05                                                             | 0.03                                                        | 0.07                                                            |
| PFDA  | 0.02                                                        | 0.03                                                             | 0.02                                                        | 0.11                                                            |
| PFHxS | 0.74                                                        | 0.03                                                             | 0.00                                                        | 0.27                                                            |
| PFUA  | 0.13                                                        | 0.21                                                             | 0.17                                                        | 0.51                                                            |
| PFHpA | 0.07                                                        | 0.32                                                             | 0.58                                                        | 0.02                                                            |
|       | <b>Low-stable vs. moderate-stable</b><br>(n=145 vs. n=429)  | <b>Low-rising vs. moderate-stable</b><br>(n=19 vs. n=552)        | <b>Low-stable vs. moderate-stable</b><br>(n=51 vs. n=493)   | <b>Low-rising vs. moderate-stable</b><br>(n=42 vs. n=472)       |
| PFOS  | 0.09                                                        | 0.08                                                             | 0.09                                                        | 0.02                                                            |
| PFOA  | 0.04                                                        | <0.01                                                            | 0.41                                                        | 0.11                                                            |
| PFNA  | 0.48                                                        | <0.01                                                            | 0.01                                                        | 0.19                                                            |
| PFDA  | <0.01                                                       | 0.01                                                             | 0.03                                                        | 0.33                                                            |
| PFHxS | 0.11                                                        | 0.45                                                             | 0.11                                                        | 0.20                                                            |
| PFUA  | 0.16                                                        | 0.40                                                             | 0.13                                                        | 0.10                                                            |
| PFHpA | 0.12                                                        | 0.07                                                             | 0.22                                                        | 0.05                                                            |

All models were adjusted for maternal age, maternal education, pre-pregnancy BMI, fish and seafood intake, parity, and pregnancy estimated glomerular filtration rate (eGFR).

Table S8. Odds ratio (OR) and 95% confidence interval (CI) for trajectory groups of weight-for-age and length-for-age according to per doubling increase in prenatal PFAS level (ng/ml) (stratified by sex) in Shanghai Birth Cohort, Shanghai, China, recruited from 2013 to 2016.

| PFAS      | OR (95% CI)                            |                   |                          |                                             |                   |                          |
|-----------|----------------------------------------|-------------------|--------------------------|---------------------------------------------|-------------------|--------------------------|
|           | Weight-for-age z-score (WAZ)           |                   |                          | Length-for-age z-score (LAZ)                |                   |                          |
|           | Female                                 | Male              | <i>P</i> for interaction | Female                                      | Male              | <i>P</i> for interaction |
|           | <b>High-rising vs. moderate-stable</b> |                   |                          | <b>High-rising vs. moderate-stable</b>      |                   |                          |
|           | n=75 vs. n=224                         | n=52 vs. n=205    |                          | n=20 vs. n=299                              | n=16 vs. n=253    |                          |
| PFOS      | 0.81 (0.52, 1.26)                      | 0.99 (0.67, 1.45) | 0.58                     | 1.68 (0.79, 3.58)                           | 1.11 (0.59, 2.08) | 0.66                     |
| PFOA      | 1.15 (0.66, 2.01)                      | 0.78 (0.46, 1.33) | 0.32                     | 2.37 (1.02, 5.50)                           | 0.84 (0.35, 2.04) | 0.13                     |
| PFNA      | 1.01 (0.63, 1.60)                      | 0.88 (0.58, 1.34) | 0.56                     | 2.33 (1.05, 5.17)                           | 1.39 (0.69, 2.79) | 0.31                     |
| PFDA      | 0.93 (0.63, 1.36)                      | 1.03 (0.73, 1.46) | 0.84                     | 1.52 (0.79, 2.93)                           | 1.46 (0.81, 2.62) | 0.94                     |
| PFHxS     | 1.06 (0.59, 1.89)                      | 0.82 (0.48, 1.40) | 0.48                     | 1.39 (0.54, 3.61)                           | 0.62 (0.26, 1.49) | 0.28                     |
| PFUA      | 0.95 (0.64, 1.42)                      | 1.07 (0.75, 1.51) | 0.76                     | 1.52 (0.77, 3.02)                           | 1.52 (0.82, 2.79) | 0.84                     |
| PFHpA     | 0.84 (0.66, 1.08)                      | 0.98 (0.79, 1.22) | 0.27                     | 1.20 (0.80, 1.81)                           | 1.20 (0.82, 1.76) | 0.61                     |
| WQS index | 0.86 (0.59, 1.25)                      | 0.99 (0.78, 1.27) | 0.38                     | 1.47 (0.88, 2.47)                           | 1.50 (0.83, 2.72) | 0.42                     |
|           | <b>High-stable vs. moderate-stable</b> |                   |                          | <b>Moderate-rising vs. moderate-stable</b>  |                   |                          |
|           | n=232 vs. n=224                        | n=256 vs. n=205   |                          | n=148 vs. n=299                             | n=164 vs. n=253   |                          |
| PFOS      | 0.88 (0.68, 1.14)                      | 1.17 (0.90, 1.50) | 0.09                     | 1.03 (0.78, 1.35)                           | 1.04 (0.79, 1.37) | 0.98                     |
| PFOA      | 0.89 (0.64, 1.24)                      | 1.02 (0.71, 1.46) | 0.71                     | 1.01 (0.72, 1.44)                           | 0.82 (0.56, 1.21) | 0.46                     |
| PFNA      | 1.05 (0.80, 1.38)                      | 1.15 (0.87, 1.51) | 0.86                     | 1.10 (0.82, 1.46)                           | 0.94 (0.70, 1.25) | 0.29                     |
| PFDA      | 0.96 (0.77, 1.20)                      | 1.21 (0.95, 1.53) | 0.20                     | 1.03 (0.81, 1.31)                           | 1.10 (0.86, 1.42) | 0.94                     |
| PFHxS     | 0.90 (0.64, 1.27)                      | 1.18 (0.82, 1.71) | 0.29                     | 1.21 (0.84, 1.75)                           | 0.92 (0.63, 1.34) | 0.44                     |
| PFUA      | 1.01 (0.80, 1.27)                      | 1.23 (0.97, 1.56) | 0.24                     | 0.98 (0.77, 1.26)                           | 1.17 (0.91, 1.51) | 0.52                     |
| PFHpA     | 1.06 (0.91, 1.22)                      | 0.99 (0.86, 1.15) | 0.43                     | 1.01 (0.87, 1.18)                           | 0.92 (0.79, 1.07) | 0.32                     |
| WQS index | 0.99 (0.78, 1.27)                      | 1.22 (0.98, 1.51) | 0.53                     | 1.00 (0.80, 1.25)                           | 1.18 (0.91, 1.52) | 0.15                     |
|           | <b>Low-rising vs. moderate-stable</b>  |                   |                          | <b>Moderate-falling vs. moderate-stable</b> |                   |                          |
|           | n=89 vs. n=224                         | n=68 vs. n=205    |                          | n=128 vs. n=299                             | n=93 vs. n=253    |                          |
| PFOS      | 0.87 (0.59, 1.28)                      | 1.27 (0.90, 1.78) | 0.17                     | 0.95 (0.68, 1.34)                           | 0.93 (0.70, 1.25) | 0.95                     |
| PFOA      | 0.95 (0.59, 1.56)                      | 1.64 (1.02, 2.66) | 0.12                     | 0.98 (0.63, 1.51)                           | 0.85 (0.57, 1.27) | 0.46                     |
| PFNA      | 0.96 (0.64, 1.44)                      | 1.35 (0.94, 1.94) | 0.32                     | 0.90 (0.63, 1.28)                           | 0.96 (0.71, 1.29) | 0.76                     |
| PFDA      | 1.07 (0.77, 1.50)                      | 1.24 (0.90, 1.70) | 0.66                     | 0.91 (0.68, 1.22)                           | 0.96 (0.74, 1.25) | 0.64                     |
| PFHxS     | 1.17 (0.72, 1.91)                      | 2.12 (1.33, 3.39) | 0.10                     | 1.53 (0.98, 2.37)                           | 0.78 (0.52, 1.17) | 0.02                     |
| PFUA      | 1.03 (0.73, 1.45)                      | 1.29 (0.94, 1.78) | 0.37                     | 0.90 (0.67, 1.22)                           | 1.01 (0.78, 1.32) | 0.40                     |
| PFHpA     | 0.95 (0.77, 1.17)                      | 1.03 (0.84, 1.25) | 0.62                     | 0.90 (0.75, 1.09)                           | 1.05 (0.89, 1.24) | 0.29                     |
| WQS index | 1.13 (0.82, 1.55)                      | 1.62 (1.22, 2.13) | 0.12                     | 0.98 (0.76, 1.25)                           | 0.86 (0.63, 1.16) | 0.30                     |
|           | <b>Low-stable vs. moderate-stable</b>  |                   |                          | <b>Low-rising vs. moderate-stable</b>       |                   |                          |
|           | n=83 vs. n=224                         | n=62 vs. n=205    |                          | n=13 vs. n=299                              | n=6 vs. n=253     |                          |
| PFOS      | 0.84 (0.55, 1.26)                      | 1.34 (0.95, 1.90) | 0.12                     | NA                                          | NA                | NA                       |
| PFOA      | 0.67 (0.40, 1.13)                      | 1.12 (0.68, 1.84) | 0.25                     | NA                                          | NA                | NA                       |
| PFNA      | 0.82 (0.53, 1.26)                      | 1.62 (1.10, 2.39) | 0.04                     | NA                                          | NA                | NA                       |
| PFDA      | 0.80 (0.56, 1.15)                      | 1.25 (0.90, 1.73) | 0.11                     | NA                                          | NA                | NA                       |
| PFHxS     | 0.96 (0.56, 1.65)                      | 1.12 (0.68, 1.86) | 0.82                     | NA                                          | NA                | NA                       |
| PFUA      | 0.86 (0.60, 1.25)                      | 1.34 (0.96, 1.87) | 0.14                     | NA                                          | NA                | NA                       |
| PFHpA     | 0.90 (0.72, 1.13)                      | 1.04 (0.84, 1.28) | 0.33                     | NA                                          | NA                | NA                       |
| WQS index | 0.86 (0.63, 1.19)                      | 1.34 (0.95, 1.88) | 0.34                     | NA                                          | NA                | NA                       |

CI, confidence interval; OR, odds ratio; WQS, weighted quantile sum.

All models were adjusted for maternal age, maternal education, pre-pregnancy BMI, fish and seafood intake, parity, and pregnancy estimated glomerular filtration rate (eGFR).

Table S9. Odds ratio (OR) and 95% confidence interval (CI) for trajectory groups of weight-for-length and head-circumference-for-age according to per doubling increase in prenatal PFAS level (ng/ml) (stratified by sex) in Shanghai Birth Cohort, Shanghai, China, recruited from 2013 to 2016.

| PFAS      | OR (95% CI)                            |                   |                          |                                            |                   |                          |
|-----------|----------------------------------------|-------------------|--------------------------|--------------------------------------------|-------------------|--------------------------|
|           | Weight-for-length (WLZ)                |                   |                          | Head-circumference-for-age (HCZ)           |                   |                          |
|           | Female                                 | Male              | <i>P</i> for interaction | Female                                     | Male              | <i>P</i> for interaction |
|           | <b>High-rising vs. moderate-stable</b> |                   |                          | <b>High-stable vs. moderate-stable</b>     |                   |                          |
|           | n=96 vs. n=252                         | n=53 vs. n=241    |                          | n=22 vs. n=270                             | n=25 vs. n=202    |                          |
| PFOS      | 0.87 (0.57, 1.34)                      | 0.80 (0.57, 1.12) | 0.56                     | 0.80 (0.44, 1.46)                          | 0.93 (0.50, 1.73) | 0.96                     |
| PFOA      | 0.99 (0.57, 1.71)                      | 1.01 (0.65, 1.59) | 0.82                     | 1.23 (0.58, 2.61)                          | 0.60 (0.26, 1.36) | 0.18                     |
| PFNA      | 0.78 (0.50, 1.22)                      | 0.84 (0.59, 1.18) | 0.68                     | 1.01 (0.54, 1.89)                          | 0.61 (0.35, 1.06) | 0.19                     |
| PFDA      | 0.88 (0.61, 1.28)                      | 0.92 (0.68, 1.24) | 0.77                     | 0.79 (0.47, 1.32)                          | 0.68 (0.39, 1.17) | 0.60                     |
| PFHxS     | 0.89 (0.50, 1.59)                      | 0.89 (0.56, 1.41) | 0.79                     | 0.63 (0.28, 1.42)                          | 0.52 (0.22, 1.25) | 0.70                     |
| PFUA      | 0.86 (0.59, 1.27)                      | 0.86 (0.64, 1.16) | 0.82                     | 0.69 (0.40, 1.18)                          | 0.72 (0.43, 1.21) | 1.00                     |
| PFHpA     | 0.72 (0.86, 0.93)                      | 0.94 (0.70, 1.12) | 0.05                     | 0.64 (0.45, 0.91)                          | 0.88 (0.62, 1.25) | 0.27                     |
| WQS index | 0.84 (0.68, 1.05)                      | 0.87 (0.60, 1.25) | 0.72                     | 0.60 (0.34, 1.06)                          | 0.75 (0.36, 1.57) | 0.15                     |
|           | <b>High-stable vs. moderate-stable</b> |                   |                          | <b>Moderate-rising vs. moderate-stable</b> |                   |                          |
|           | n=187 vs. n=252                        | n=180 vs. n=241   |                          | n=184 vs. n=270                            | n=189 vs. n=202   |                          |
| PFOS      | 0.89 (0.67, 1.17)                      | 1.32 (1.02, 1.72) | 0.05                     | 0.90 (0.68, 1.2)                           | 1.09 (0.83, 1.42) | 0.68                     |
| PFOA      | 1.09 (0.77, 1.55)                      | 1.15 (0.80, 1.67) | 0.98                     | 1.05 (0.73, 1.51)                          | 0.86 (0.60, 1.24) | 0.48                     |
| PFNA      | 1.02 (0.76, 1.36)                      | 1.25 (0.94, 1.65) | 0.38                     | 0.98 (0.73, 1.32)                          | 1.11 (0.84, 1.48) | 0.78                     |
| PFDA      | 0.93 (0.73, 1.19)                      | 1.36 (1.06, 1.74) | 0.04                     | 0.93 (0.73, 1.19)                          | 1.24 (0.97, 1.58) | 0.30                     |
| PFHxS     | 1.08 (0.74, 1.56)                      | 1.27 (0.88, 1.84) | 0.48                     | 0.96 (0.66, 1.39)                          | 0.65 (0.44, 0.95) | 0.16                     |
| PFUA      | 0.95 (0.74, 1.23)                      | 1.28 (1.00, 1.63) | 0.10                     | 0.92 (0.72, 1.19)                          | 1.30 (1.01, 1.67) | 0.18                     |
| PFHpA     | 1.11 (0.94, 1.31)                      | 0.93 (0.80, 1.08) | 0.13                     | 1.15 (0.98, 1.35)                          | 1.01 (0.87, 1.17) | 0.33                     |
| WQS index | 1.06 (0.82, 1.36)                      | 1.14 (0.89, 1.46) | 0.90                     | 1.01 (0.85, 1.2)                           | 1.12 (0.87, 1.45) | 0.37                     |
|           | <b>Low-rising vs. moderate-stable</b>  |                   |                          | <b>Low-stable vs. moderate-stable</b>      |                   |                          |
|           | n=31 vs. n=252                         | n=43 vs. n=241    |                          | n=91 vs. n=270                             | n=68 vs. n=202    |                          |
| PFOS      | 0.49 (0.30, 0.79)                      | 0.96 (0.62, 1.51) | 0.08                     | 0.66 (0.44, 0.99)                          | 0.95 (0.68, 1.32) | 0.38                     |
| PFOA      | 0.98 (0.55, 1.73)                      | 1.05 (0.56, 1.98) | 0.99                     | 0.62 (0.37, 1.03)                          | 0.82 (0.52, 1.29) | 0.52                     |
| PFNA      | 0.53 (0.33, 0.85)                      | 1.24 (0.77, 2.01) | 0.03                     | 0.62 (0.41, 0.93)                          | 0.90 (0.64, 1.27) | 0.14                     |
| PFDA      | 0.60 (0.40, 0.89)                      | 1.20 (0.79, 1.82) | 0.04                     | 0.62 (0.44, 0.88)                          | 0.94 (0.69, 1.26) | 0.11                     |
| PFHxS     | 0.80 (0.43, 1.48)                      | 1.85 (1.00, 3.41) | 0.11                     | 0.80 (0.48, 1.33)                          | 0.67 (0.42, 1.07) | 0.54                     |
| PFUA      | 0.55 (0.37, 0.83)                      | 1.28 (0.84, 1.97) | 0.01                     | 0.60 (0.42, 0.85)                          | 0.92 (0.68, 1.24) | 0.12                     |
| PFHpA     | 0.78 (0.61, 0.99)                      | 0.87 (0.68, 1.12) | 0.55                     | 1.00 (0.81, 1.25)                          | 1.10 (0.90, 1.33) | 0.32                     |
| WQS index | 0.73 (0.48, 1.12)                      | 1.14 (0.78, 1.64) | 0.12                     | 0.68 (0.55, 0.85)                          | 0.57 (0.41, 0.80) | 0.27                     |
|           | <b>Low-stable vs. moderate-stable</b>  |                   |                          | <b>Low-rising vs. moderate-stable</b>      |                   |                          |
|           | n=22 vs. n=252                         | n=29 vs. n=241    |                          | n=14 vs. n=270                             | n=17 vs. n=202    |                          |
| PFOS      | 1.15 (0.64, 2.06)                      | 1.11 (0.64, 1.93) | 0.89                     | 0.48 (0.22, 1.01)                          | 1.01 (0.46, 2.20) | 0.14                     |
| PFOA      | 1.12 (0.58, 2.16)                      | 1.55 (0.70, 3.40) | 0.52                     | 0.81 (0.32, 2.03)                          | 1.19 (0.40, 3.54) | 0.73                     |
| PFNA      | 0.97 (0.55, 1.74)                      | 1.33 (0.73, 2.42) | 0.39                     | 0.53 (0.26, 1.09)                          | 0.88 (0.38, 2.04) | 0.36                     |
| PFDA      | 1.08 (0.67, 1.74)                      | 1.18 (0.70, 1.99) | 0.65                     | 0.48 (0.26, 0.9)                           | 0.92 (0.45, 1.88) | 0.22                     |
| PFHxS     | 0.86 (0.42, 1.78)                      | 1.64 (0.78, 3.47) | 0.30                     | 0.44 (0.16, 1.19)                          | 0.88 (0.30, 2.57) | 0.36                     |
| PFUA      | 1.10 (0.66, 1.82)                      | 1.19 (0.70, 2.05) | 0.69                     | 0.45 (0.24, 0.84)                          | 0.92 (0.45, 1.86) | 0.17                     |
| PFHpA     | 0.91 (0.67, 1.23)                      | 1.09 (0.76, 1.57) | 0.34                     | 0.80 (0.56, 1.15)                          | 1.29 (0.81, 2.03) | 0.08                     |
| WQS index | 1.20 (0.83, 1.75)                      | 1.10 (0.68, 1.79) | 0.72                     | 0.50 (0.31, 0.80)                          | 0.76 (0.35, 1.68) | 0.26                     |

CI, confidence interval; OR, odds ratio; WQS, weighted quantile sum.

All models were adjusted for maternal age, maternal education, pre-pregnancy BMI, fish and seafood intake, parity, and pregnancy estimated glomerular filtration rate (eGFR).

Table S10. The number of participants in each trajectory and the number by sex in Shanghai Birth Cohort, Shanghai, China, recruited from 2013 to 2016.

| Trajectory groups                               | Total number of participants | Male | Female |
|-------------------------------------------------|------------------------------|------|--------|
| <b>Weight-for-age z-score (WAZ)</b>             |                              |      |        |
| High-rising                                     | 127                          | 52   | 75     |
| High-stable                                     | 488                          | 256  | 232    |
| Moderate-stable                                 | 429                          | 205  | 224    |
| Low-rising                                      | 157                          | 68   | 89     |
| Low-stable                                      | 145                          | 62   | 83     |
| <b>Length-for-age z-score (LAZ)</b>             |                              |      |        |
| High-rising                                     | 36                           | 16   | 20     |
| Moderate-rising                                 | 312                          | 164  | 148    |
| Moderate-stable                                 | 552                          | 253  | 299    |
| Moderate-falling                                | 221                          | 93   | 128    |
| Low-rising                                      | 19                           | 6    | 13     |
| <b>Weight-for-length z-score (WLZ)</b>          |                              |      |        |
| High-rising                                     | 149                          | 53   | 96     |
| High-stable                                     | 367                          | 180  | 187    |
| Moderate-stable                                 | 493                          | 241  | 252    |
| Low-rising                                      | 74                           | 43   | 31     |
| Low-stable                                      | 51                           | 29   | 22     |
| <b>Head-circumference-for-age z-score (HCZ)</b> |                              |      |        |
| High-stable                                     | 47                           | 25   | 22     |
| Moderate-stable                                 | 373                          | 189  | 184    |
| Moderate-rising                                 | 472                          | 202  | 270    |
| Low-rising                                      | 159                          | 68   | 91     |
| Low-stable                                      | 31                           | 17   | 14     |

Table S11. Odds ratio (OR) and 95% confidence interval (CI) for trajectory groups in each anthropometrical measure according to per doubling increase in prenatal PFAS level (ng/ml) for sensitivity analysis in Shanghai Birth Cohort, Shanghai, China, recruited from 2013 to 2016 (additionally adjusted for active or passive smoking during pregnancy, gestational weight gain, breastfeeding after birth, delivery method, child sex, nutrient supplementation during pregnancy, infant nutrient supplementation, and infancy outdoor activity).

| PFAS      | OR (95% CI)                                                 |                                                                  |                                                             |                                                                 |
|-----------|-------------------------------------------------------------|------------------------------------------------------------------|-------------------------------------------------------------|-----------------------------------------------------------------|
|           | Weight-for-age z-score (WAZ)                                | Length-for-age z-score (LAZ)                                     | Weight-for-length z-score (WLZ)                             | Head-circumference-for-age z-score (HCZ)                        |
|           | <b>High-rising vs. moderate-stable</b><br>(n=127 vs. n=429) | <b>High-rising vs. moderate-stable</b><br>(n=36 vs. n=552)       | <b>High-rising vs. moderate-stable</b><br>(n=149 vs. n=493) | <b>High-stable vs. moderate-stable</b><br>(n=47 vs. n=472)      |
| PFOS      | 0.98 (0.70, 1.36)                                           | 1.53 (0.92, 2.54)                                                | 0.85 (0.64, 1.15)                                           | 0.98 (0.59, 1.63)                                               |
| PFOA      | 1.07 (0.70, 1.62)                                           | 1.44 (0.78, 2.66)                                                | 1.02 (0.69, 1.51)                                           | 0.75 (0.40, 1.43)                                               |
| PFNA      | 1.00 (0.72, 1.40)                                           | 1.92 (1.11, 3.31)                                                | 0.88 (0.65, 1.19)                                           | 0.78 (0.47, 1.31)                                               |
| PFDA      | 1.00 (0.75, 1.34)                                           | 1.51 (0.96, 2.37)                                                | 0.91 (0.70, 1.18)                                           | 0.79 (0.51, 1.24)                                               |
| PFHxS     | 1.01 (0.65, 1.55)                                           | 1.07 (0.56, 2.06)                                                | 0.96 (0.65, 1.42)                                           | 0.70 (0.36, 1.36)                                               |
| PFUA      | 1.00 (0.74, 1.33)                                           | 1.49 (0.92, 2.41)                                                | 0.87 (0.67, 1.13)                                           | 0.75 (0.48, 1.16)                                               |
| PFHpA     | 1.12 (0.94, 1.34)                                           | 1.19 (0.88, 1.60)                                                | 0.85 (0.72, 1.01)                                           | 0.75 (0.56, 1.00)                                               |
| WQS index | 1.02 (0.71, 1.46)                                           | 1.56 (1.03, 2.36)                                                | 0.83 (0.68, 1.05)                                           | 0.72 (0.52, 0.99)                                               |
|           | <b>High-stable vs. moderate-stable</b><br>(n=488 vs. n=429) | <b>Moderate-rising vs. moderate-stable</b><br>(n=312 vs. n=552)  | <b>High-stable vs. moderate-stable</b><br>(n=367 vs. n=493) | <b>Moderate-rising vs. moderate-stable</b><br>(n=373 vs. n=472) |
| PFOS      | 1.06 (0.86, 1.32)                                           | 0.96 (0.78, 1.18)                                                | 1.03 (0.83, 1.27)                                           | 0.98 (0.79, 1.21)                                               |
| PFOA      | 1.03 (0.78, 1.37)                                           | 0.89 (0.68, 1.17)                                                | 1.18 (0.90, 1.56)                                           | 0.97 (0.73, 1.28)                                               |
| PFNA      | 1.16 (0.93, 1.45)                                           | 0.94 (0.75, 1.16)                                                | 1.05 (0.85, 1.31)                                           | 0.99 (0.80, 1.23)                                               |
| PFDA      | 1.08 (0.89, 1.30)                                           | 0.99 (0.82, 1.20)                                                | 1.03 (0.86, 1.25)                                           | 1.01 (0.83, 1.21)                                               |
| PFHxS     | 1.04 (0.78, 1.39)                                           | 1.12 (0.85, 1.47)                                                | 1.29 (0.97, 1.71)                                           | 0.72 (0.54, 0.96)                                               |
| PFUA      | 1.12 (0.92, 1.35)                                           | 0.96 (0.79, 1.16)                                                | 1.03 (0.85, 1.25)                                           | 1.01 (0.83, 1.22)                                               |
| PFHpA     | 1.07 (0.95, 1.21)                                           | 0.97 (0.87, 1.09)                                                | 1.01 (0.90, 1.13)                                           | 1.13 (0.99, 1.28)                                               |
| WQS index | 1.10 (0.95, 1.27)                                           | 0.92 (0.76, 1.11)                                                | 1.20 (0.98, 1.47)                                           | 1.09 (0.97, 1.22)                                               |
|           | <b>Low-rising vs. moderate-stable</b><br>(n=157 vs. n=429)  | <b>Moderate-falling vs. moderate-stable</b><br>(n=221 vs. n=552) | <b>Low-rising vs. moderate-stable</b><br>(n=74 vs. n=493)   | <b>Low-stable vs. moderate-stable</b><br>(n=159 vs. n=472)      |
| PFOS      | 1.16 (0.87, 1.56)                                           | 0.97 (0.78, 1.22)                                                | 0.86 (0.58, 1.26)                                           | 0.82 (0.61, 1.09)                                               |
| PFOA      | 1.26 (0.85, 1.86)                                           | 0.94 (0.70, 1.26)                                                | 0.97 (0.59, 1.62)                                           | 0.72 (0.49, 1.05)                                               |
| PFNA      | 1.27 (0.93, 1.72)                                           | 0.96 (0.76, 1.21)                                                | 0.94 (0.63, 1.39)                                           | 0.79 (0.59, 1.06)                                               |
| PFDA      | 1.23 (0.95, 1.60)                                           | 0.91 (0.74, 1.12)                                                | 0.99 (0.70, 1.39)                                           | 0.81 (0.63, 1.05)                                               |
| PFHxS     | 1.48 (1.02, 2.16)                                           | 1.19 (0.88, 1.60)                                                | 0.87 (0.52, 1.45)                                           | 0.61 (0.41, 0.90)                                               |
| PFUA      | 1.21 (0.93, 1.58)                                           | 0.91 (0.74, 1.11)                                                | 0.98 (0.70, 1.38)                                           | 0.81 (0.62, 1.05)                                               |
| PFHpA     | 1.04 (0.88, 1.23)                                           | 0.95 (0.83, 1.08)                                                | 0.91 (0.74, 1.12)                                           | 0.93 (0.79, 1.09)                                               |
| WQS index | 1.31 (1.01, 1.70)                                           | 0.92 (0.76, 1.13)                                                | 0.76 (0.56, 1.03)                                           | 0.72 (0.56, 0.93)                                               |
|           | <b>Low-stable vs. moderate-stable</b><br>(n=145 vs. n=429)  | <b>Low-rising vs. moderate-stable</b><br>(n=19 vs. n=552)        | <b>Low-stable vs. moderate-stable</b><br>(n=51 vs. n=493)   | <b>Low-rising vs. moderate-stable</b><br>(n=42 vs. n=472)       |
| PFOS      | 1.21 (0.87, 1.68)                                           | 0.60 (0.31, 1.16)                                                | 1.16 (0.72, 1.86)                                           | 0.71 (0.38, 1.31)                                               |
| PFOA      | 1.16 (0.76, 1.78)                                           | 0.93 (0.40, 2.16)                                                | 1.16 (0.63, 2.12)                                           | 0.97 (0.46, 2.07)                                               |
| PFNA      | 1.41 (1.00, 1.99)                                           | 1.01 (0.53, 1.92)                                                | 1.28 (0.78, 2.10)                                           | 0.72 (0.41, 1.24)                                               |
| PFDA      | 1.10 (0.82, 1.49)                                           | 0.64 (0.35, 1.16)                                                | 1.26 (0.81, 1.96)                                           | 0.64 (0.38, 1.09)                                               |
| PFHxS     | 1.17 (0.76, 1.80)                                           | 0.61 (0.25, 1.49)                                                | 1.08 (0.58, 2.01)                                           | 0.45 (0.19, 1.04)                                               |
| PFUA      | 1.22 (0.90, 1.66)                                           | 0.67 (0.38, 1.17)                                                | 1.31 (0.83, 2.08)                                           | 0.61 (0.36, 1.03)                                               |
| PFHpA     | 1.04 (0.87, 1.25)                                           | 0.91 (0.64, 1.30)                                                | 1.16 (0.88, 1.52)                                           | 0.93 (0.58, 1.28)                                               |
| WQS index | 1.33 (1.00, 1.77)                                           | 0.66 (0.21, 2.07)                                                | 1.20 (0.82, 1.75)                                           | 0.61 (0.37, 1.00)                                               |

All models were adjusted for maternal age, maternal education, pre-pregnancy BMI, fish and seafood intake during pregnancy, parity, and pregnancy eGFR, and additionally adjusted for active or passive smoking during pregnancy, pre-pregnancy BMI, gestational weight gain, breastfeeding after birth, delivery method, child sex, nutrient supplementation during pregnancy, infant nutrient supplementation, and infancy outdoor activity.

Table S12. *P* values for departure from linearity in generalized additive models (GAM) in Shanghai Birth Cohort, Shanghai, China, recruited from 2013 to 2016.

| PFAS  | P value for linearity departure from generalized additive model |                                                                  |                                                             |                                                                 |
|-------|-----------------------------------------------------------------|------------------------------------------------------------------|-------------------------------------------------------------|-----------------------------------------------------------------|
|       | Weight-for-age z-score (WAZ)                                    | Length-for-age z-score (LAZ)                                     | Weight-for-length z-score (WLZ)                             | Head-circumference-for-age z-score (HCZ)                        |
|       | <b>High-rising vs. moderate-stable</b><br>(n=127 vs. n=429)     | <b>High-rising vs. moderate-stable</b><br>(n=36 vs. n=552)       | <b>High-rising vs. moderate-stable</b><br>(n=149 vs. n=493) | <b>High-stable vs. moderate-stable</b><br>(n=47 vs. n=472)      |
| PFOS  | 0.83                                                            | 0.60                                                             | 0.47                                                        | 0.06                                                            |
| PFOA  | 0.69                                                            | 0.71                                                             | 0.15                                                        | 0.07                                                            |
| PFNA  | 0.64                                                            | 0.19                                                             | 0.36                                                        | 0.15                                                            |
| PFDA  | 0.75                                                            | 0.12                                                             | 0.27                                                        | 0.03                                                            |
| PFHxS | 0.25                                                            | 0.20                                                             | 0.15                                                        | 0.06                                                            |
| PFUA  | 0.99                                                            | 0.18                                                             | 0.39                                                        | 0.13                                                            |
| PFHpA | 0.06                                                            | 0.21                                                             | 0.03                                                        | 0.11                                                            |
|       | <b>High-stable vs. moderate-stable</b><br>(n=488 vs. n=429)     | <b>Moderate-rising vs. moderate-stable</b><br>(n=312 vs. n=552)  | <b>High-stable vs. moderate-stable</b><br>(n=367 vs. n=493) | <b>Moderate-rising vs. moderate-stable</b><br>(n=373 vs. n=472) |
| PFOS  | 0.74                                                            | 0.95                                                             | 0.65                                                        | 0.88                                                            |
| PFOA  | 0.72                                                            | 0.33                                                             | 0.49                                                        | 0.93                                                            |
| PFNA  | 0.44                                                            | 0.93                                                             | 0.67                                                        | 0.82                                                            |
| PFDA  | 0.49                                                            | 0.92                                                             | 0.52                                                        | 0.32                                                            |
| PFHxS | 0.93                                                            | 0.89                                                             | 0.50                                                        | 0.19                                                            |
| PFUA  | 0.32                                                            | 0.69                                                             | 0.65                                                        | 0.36                                                            |
| PFHpA | 0.32                                                            | 0.38                                                             | 0.91                                                        | 0.67                                                            |
|       | <b>Low-rising vs. moderate-stable</b><br>(n=157 vs. n=429)      | <b>Moderate-falling vs. moderate-stable</b><br>(n=221 vs. n=552) | <b>Low-rising vs. moderate-stable</b><br>(n=74 vs. n=493)   | <b>Low-stable vs. moderate-stable</b><br>(n=159 vs. n=472)      |
| PFOS  | 0.43                                                            | 0.52                                                             | 0.06                                                        | 0.09                                                            |
| PFOA  | 0.42                                                            | 0.16                                                             | 0.94                                                        | 0.10                                                            |
| PFNA  | 0.30                                                            | 0.62                                                             | 0.24                                                        | 0.02                                                            |
| PFDA  | 0.21                                                            | 0.35                                                             | 0.31                                                        | 0.05                                                            |
| PFHxS | 0.11                                                            | 0.96                                                             | 0.59                                                        | 0.13                                                            |
| PFUA  | 0.21                                                            | 0.87                                                             | 0.28                                                        | 0.04                                                            |
| PFHpA | 0.18                                                            | 0.66                                                             | 0.01                                                        | 0.61                                                            |
|       | <b>Low-stable vs. moderate-stable</b><br>(n=145 vs. n=429)      | <b>Low-rising vs. moderate-stable</b><br>(n=19 vs. n=552)        | <b>Low-stable vs. moderate-stable</b><br>(n=51 vs. n=493)   | <b>Low-rising vs. moderate-stable</b><br>(n=42 vs. n=472)       |
| PFOS  | 0.80                                                            | 0.70                                                             | 0.64                                                        | 0.18                                                            |
| PFOA  | 0.76                                                            | 0.83                                                             | 0.45                                                        | 0.34                                                            |
| PFNA  | 0.55                                                            | 0.98                                                             | 0.86                                                        | 0.08                                                            |
| PFDA  | 0.71                                                            | 0.58                                                             | 0.75                                                        | 0.07                                                            |
| PFHxS | 0.92                                                            | 0.55                                                             | 0.66                                                        | 0.17                                                            |
| PFUA  | 0.45                                                            | 0.57                                                             | 0.86                                                        | 0.05                                                            |
| PFHpA | 0.98                                                            | 0.39                                                             | 0.69                                                        | 0.48                                                            |

All models were adjusted for maternal age, maternal education, pre-pregnancy BMI, fish and seafood intake, parity, and pregnancy estimated glomerular filtration rate (eGFR).

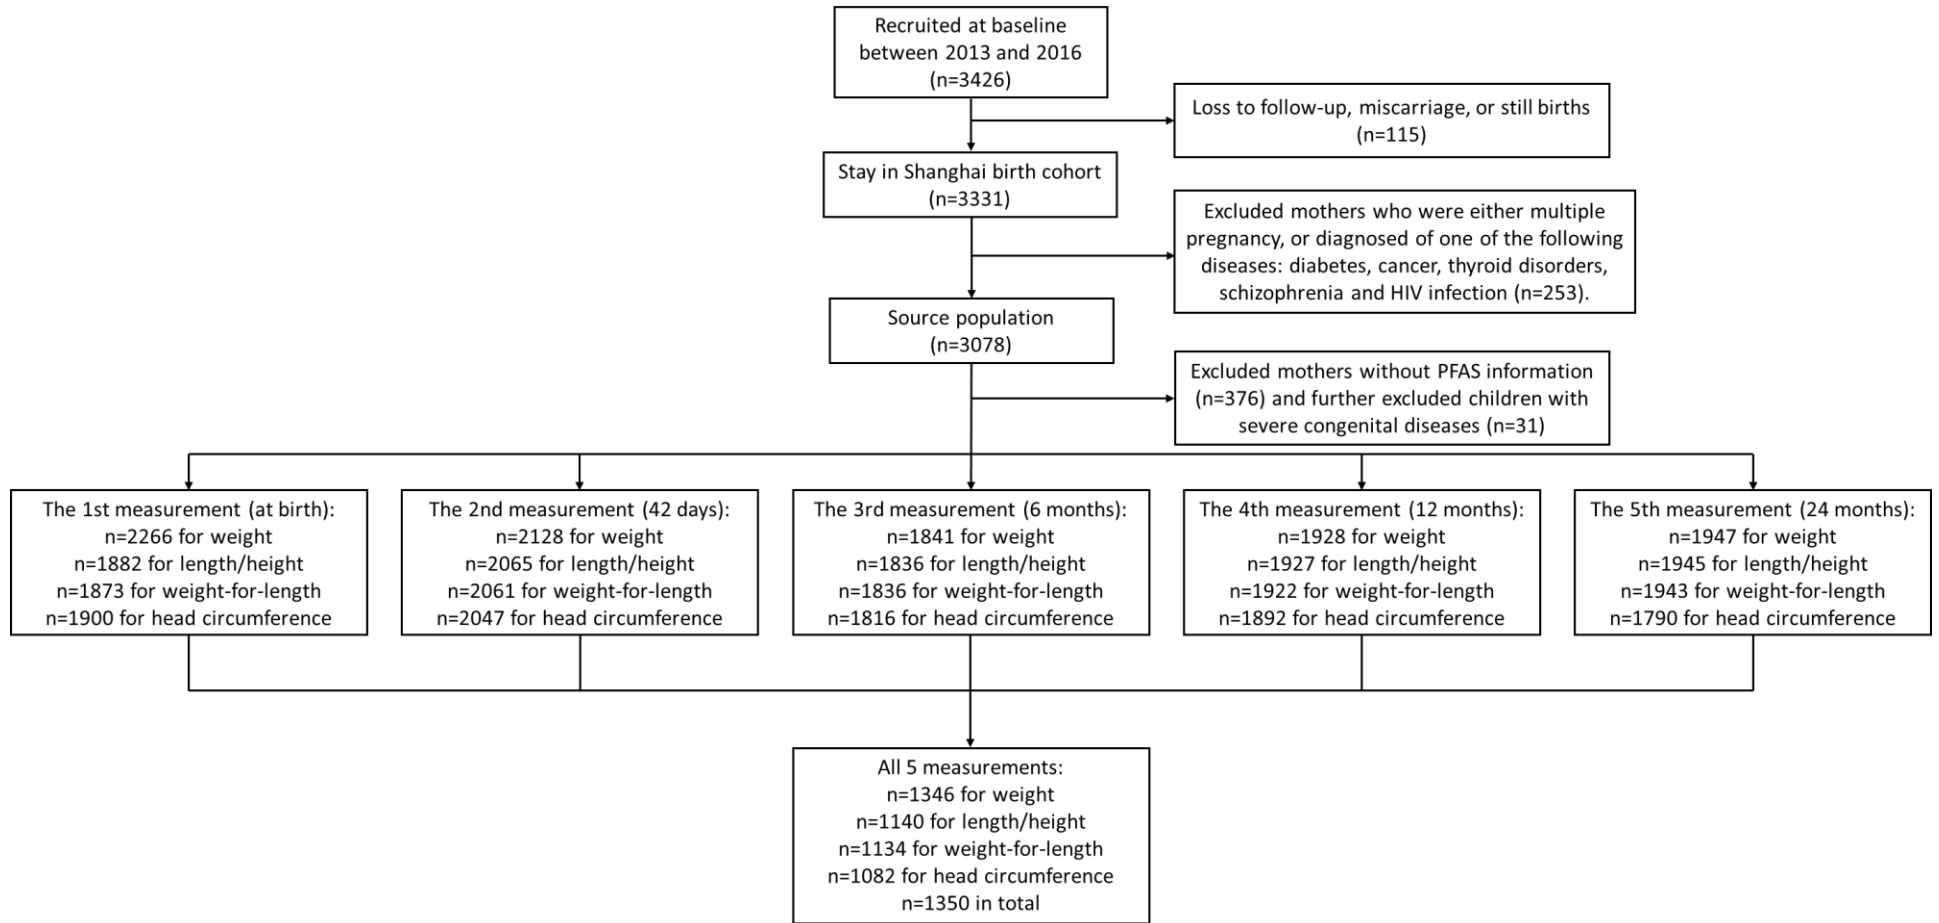

Figure S1. Flowchart for study population selection in Shanghai Birth Cohort, Shanghai, China, recruited from 2013 to 2016.

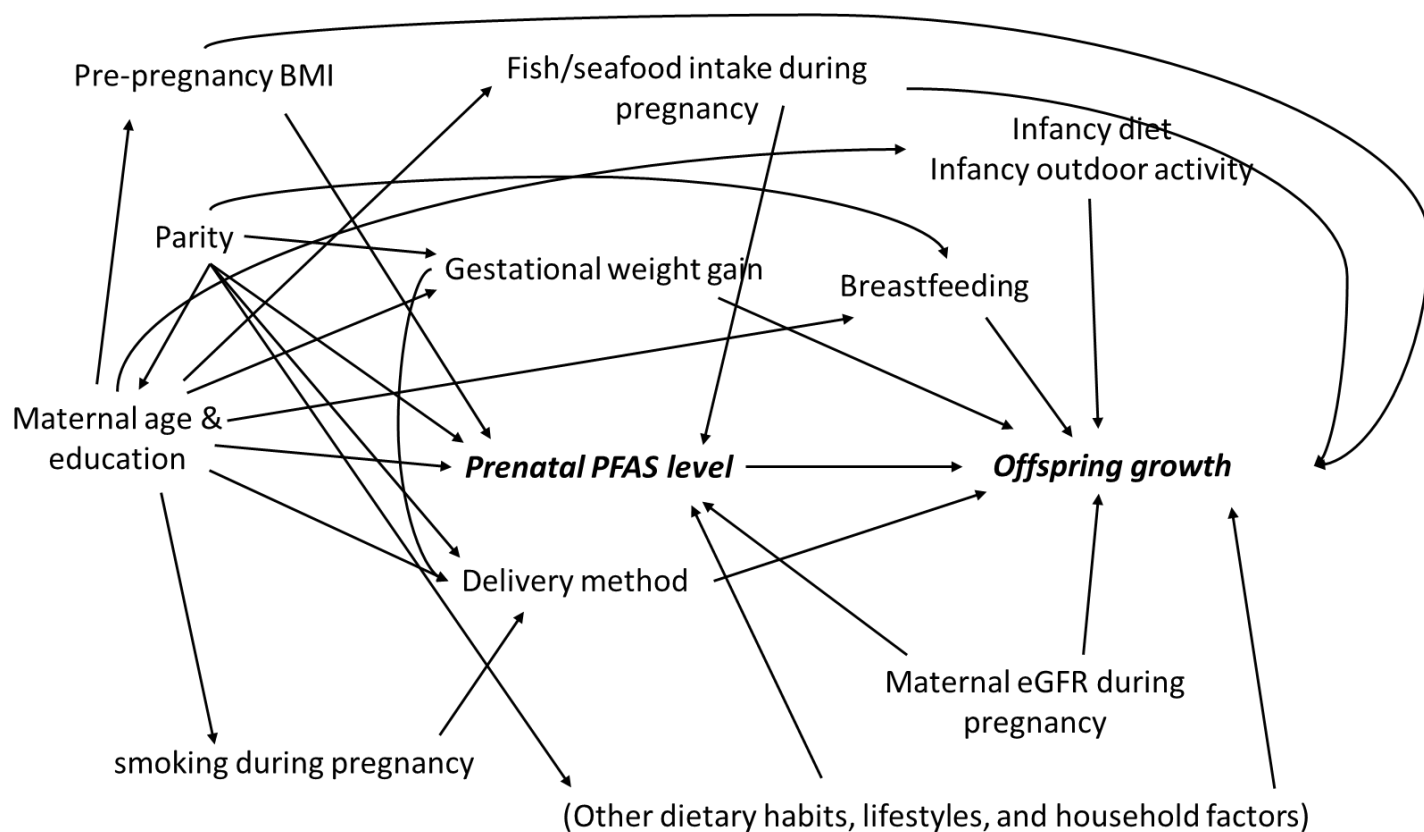

Figure S2. The directed acyclic graph (DAG) for all potential confounders considered in the statistical analyses in Shanghai Birth Cohort, Shanghai, China, recruited from 2013 to 2016. The directed paths from prenatal PFAS to offspring growth represents the potential causal effect of interests that we aim to investigate in this study. Variables with parenthesis indicate possible unmeasured/uncontrolled confounders that should be evaluated for their potential impacts in future studies.



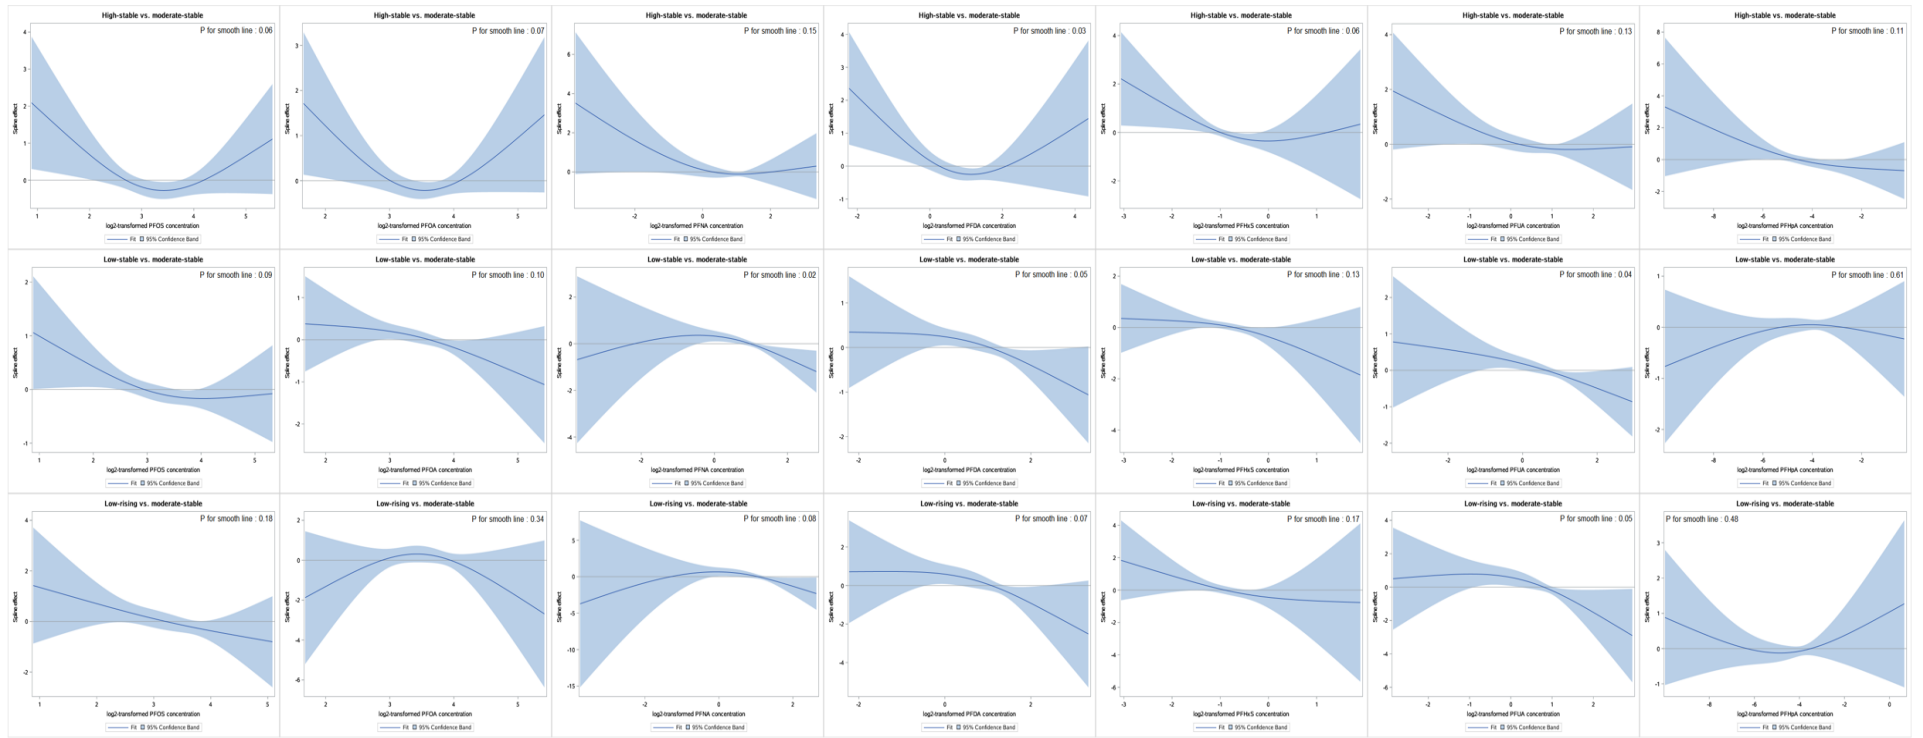

Figure S3. Relationship between prenatal PFAS level (ng/ml) and trajectory groups in each anthropometrical measure in the generalized additive models (GAM), both the fitted and 95% confidence interval lines are presented in Shanghai Birth Cohort, Shanghai, China, recruited from 2013 to 2016.
